# Supplementary material for: Hybrid integrated photonics using bulk acoustic resonators
Source: PubMed Central journal article supplement (PMC7299988; doi:10.1038/s41467-020-16812-6), 2020-06-17
Supplement: 41467_2020_16812_MOESM2_ESM.pdf [file 41467_2020_16812_MOESM2_ESM.pdf]

**Editorial Note:** This manuscript has been previously reviewed at another journal that is not operating a transparent peer review scheme. This document only contains reviewer comments and rebuttal letters for versions considered at Nature Communications.
